# Supplementary material for: Genetic Evidence for Restricted Dispersal along Continuous Altitudinal Gradients in a Climate Change-Sensitive Mammal: The American Pika
Source: PLoS One. 2012 Jun 15;7(6):e39077. doi: 10.1371/journal.pone.0039077 (PMC3376113; doi:10.1371/journal.pone.0039077)
Supplement: Table S1 — Pairwise Euclidean geographical distances (m) between sample sites. (XLS) [file pone.0039077.s001.xls]

## Sheet: Sheet1
	A1	A2	B	C	D	E	F	G	H	I
A1	0	658	11250	12458	13618	12589	43560	49568	69053	76839
A2	658	0	10830	12110	13218	12048	43564	49482	69619	76812
B	11250	11250	0	1313	3190	1780	34304	40054	63624	70394
C	12458	12458	12110	0	2040	2020	33147	38805	62737	69212
D	13618	13618	13218	3190	0	3850	31237	37017	60984	67289
E	12589	12589	12048	1780	2020	0	34416	40072	64708	71066
F	43560	43560	43564	34304	33147	31237	0	6390	35825	39283
G	49568	49568	49482	40054	38805	37017	40072	0	35456	36959
H	69053	69053	69619	63624	62737	60984	64708	35456	0	10559
I	76839	76839	76812	70394	69212	67289	71066	36959	10559	0
