# Supplementary material for: Genetic Evidence for Restricted Dispersal along Continuous Altitudinal Gradients in a Climate Change-Sensitive Mammal: The American Pika
Source: PLoS One. 2012 Jun 15;7(6):e39077. doi: 10.1371/journal.pone.0039077 (PMC3376113; doi:10.1371/journal.pone.0039077)
Supplement: Table S4 — Test of linkage disequilibrium for each pair of loci calculated within sites. Combined p-values are given below the diagonal, and sites at which the two loci were linked are given above the diagonal. (XLS) [file pone.0039077.s004.xls]

## Sheet: Sheet1
	Ocp11	Ocp12	Ocp13	Ocp15	Ocp2	Ocp22	Ocp23	Ocp6	Ocp7
Ocp11	-	-	-	-	D	-	-	-	-
Ocp12	0.1885	-	-	-	-	-	C,D,E,F,G	-	-
Ocp13	0.072	0.0285	-	-	-	-	-	-	-
Ocp15	0.0442	0.674	0.0373	-	-	E	-	-	-
Ocp2	0.0017	0.6043	0.4939	0.1321	-	-	-	A,D	-
Ocp22	0.188	0.2007	0.0797	0.0036	0.1838	-	-	-	-
Ocp23	0.008	0	0.0823	0.8667	0.0205	0.3263	-	-	-
Ocp6	0.0532	0.6257	0.158	0.4781	0.0004	0.1714	0.1541	-	-
Ocp7	0.2072	0.6413	0.0268	0.8227	0.4557	0.9038	0.6263	0.0575	-
Ocp9	0.005	0.2644	0.0533	0.2661	0.4254	0.1742	0.4484	0.0602	0.2062
